# Supplementary material for: Phenotypic and functional characterization of pharmacologically expanded Vγ9Vδ2 T cells in pigtail macaques
Source: PubMed Central journal article supplement — iScience. 2023 Feb 25;26(3):106269. doi: 10.1016/j.isci.2023.106269 (PMC10014287; doi:10.1016/j.isci.2023.106269), 2023-02-25
Supplement: mmc1.pdf [file mmc1.pdf]

**Supplemental information**

**Phenotypic and functional characterization  
of pharmacologically expanded  
 $V\gamma 9V\delta 2$  T cells in pigtail macaques**

**Isaac M. Barber-Axthelm, Kathleen M. Wragg, Robyn Esterbauer, Thakshila H. Amarasena, Valerie R.B. Barber-Axthelm, Adam K. Wheatley, Anne M. Gibbon, Stephen J. Kent, and Jennifer A. Juno**

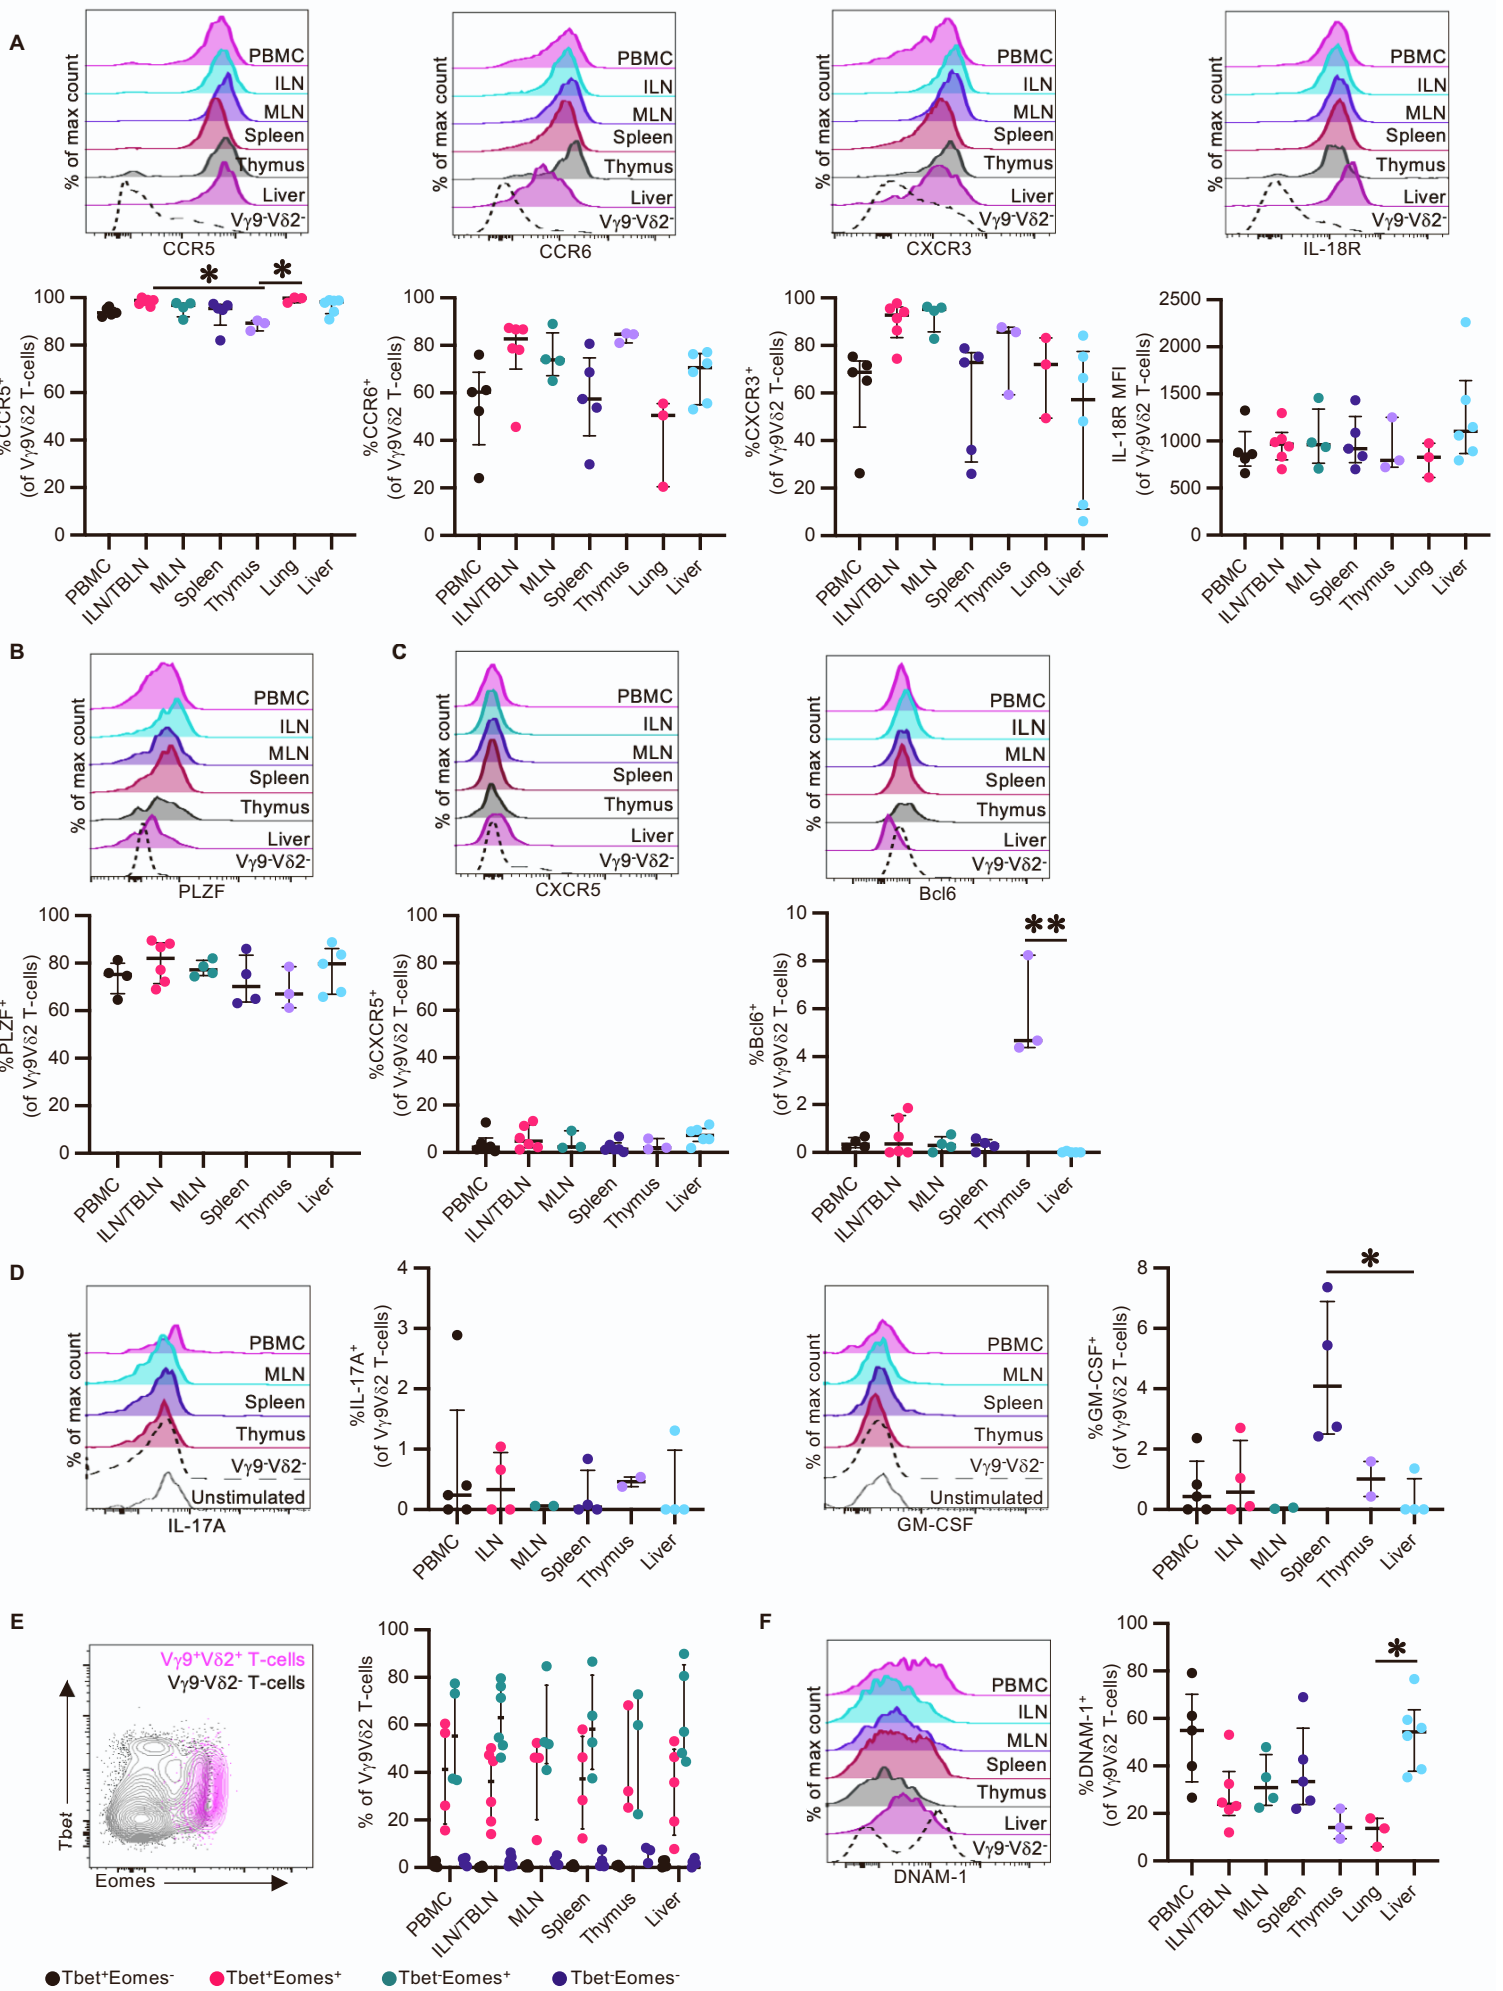

**Figure S1: V $\gamma$ 9V $\delta$ 2 T-cells phenotyping across different tissue sites, related to Figure 2.**

(figure legend on next page)

**Figure S1: V $\gamma$ 9V $\delta$ 2 T-cells phenotyping across different tissue sites, related to Figure 2.** V $\gamma$ 9V $\delta$ 2 T-cell phenotype was evaluated in peripheral blood mononuclear cells (PBMC), inguinal lymph nodes/tracheobronchial lymph nodes (ILN/TBLN), mesenteric lymph nodes (MLN), spleen, thymus, lung, and liver. **(A)** Representative histograms and frequencies of CCR5 (%), CCR6 (%), CXCR3 (%), and IL-18R (MFI) expression on V $\gamma$ 9V $\delta$ 2 T-cells (n = 3-6 animals depending on tissue availability, from 3-5 independent experiments). **(B)** Representative histograms and expression frequencies of the transcription factor PLZF (%) on V $\gamma$ 9V $\delta$ 2 T-cells (n = 3-6 animals depending on tissue availability and cell recovery, from 3-5 independent experiments). **(C)** Representative histograms and expression frequencies of the T<sub>fh</sub> associated markers CXCR5 (%) and Bcl6 (%) on V $\gamma$ 9V $\delta$ 2 T-cells (n = 3-6 animals depending on tissue availability and cell recovery, from 3-5 independent experiments). For CXCR5, samples were rested for 16hrs at 37°C and 5% CO<sub>2</sub> prior to FACS antibody labelling and data collection. **(D)** Representative histograms and expression frequencies of IL-17A (%) and GM-CSF (%) on V $\gamma$ 9V $\delta$ 2 T-cells (n = 2-6 animals depending on tissue availability and cell recovery, from 2-5 independent experiments). Cytokine production frequencies were calculated following a 16hr *in vitro* stimulation with HMB-PP as described in the Method details, and the background subtracted from paired unstimulated control samples. **(E)** Representative histograms and expression frequencies of the transcription factors T-bet and Eomes (%) on V $\gamma$ 9V $\delta$ 2 T-cells (n = 3-6 animals depending on tissue availability and cell recovery, from 3-5 independent experiments). **(F)** Representative histograms and expression frequencies of the cytotoxicity marker DNAM-1 (%) on V $\gamma$ 9V $\delta$ 2 T-cells (n = 3-6 animals depending on tissue availability and cell recovery, from 3-5 independent experiments). Each point on the graphs represents an individual animal for each tissue sample. Lines and error bars indicate the median and interquartile range. All analysis was performed on cryopreserved PBMC and tissue samples. Statistics assessed by Kruskal-Wallis test with Dunn's multiple comparisons correction **(A-D, F)**. \*p < 0.05, \*\*p < 0.01

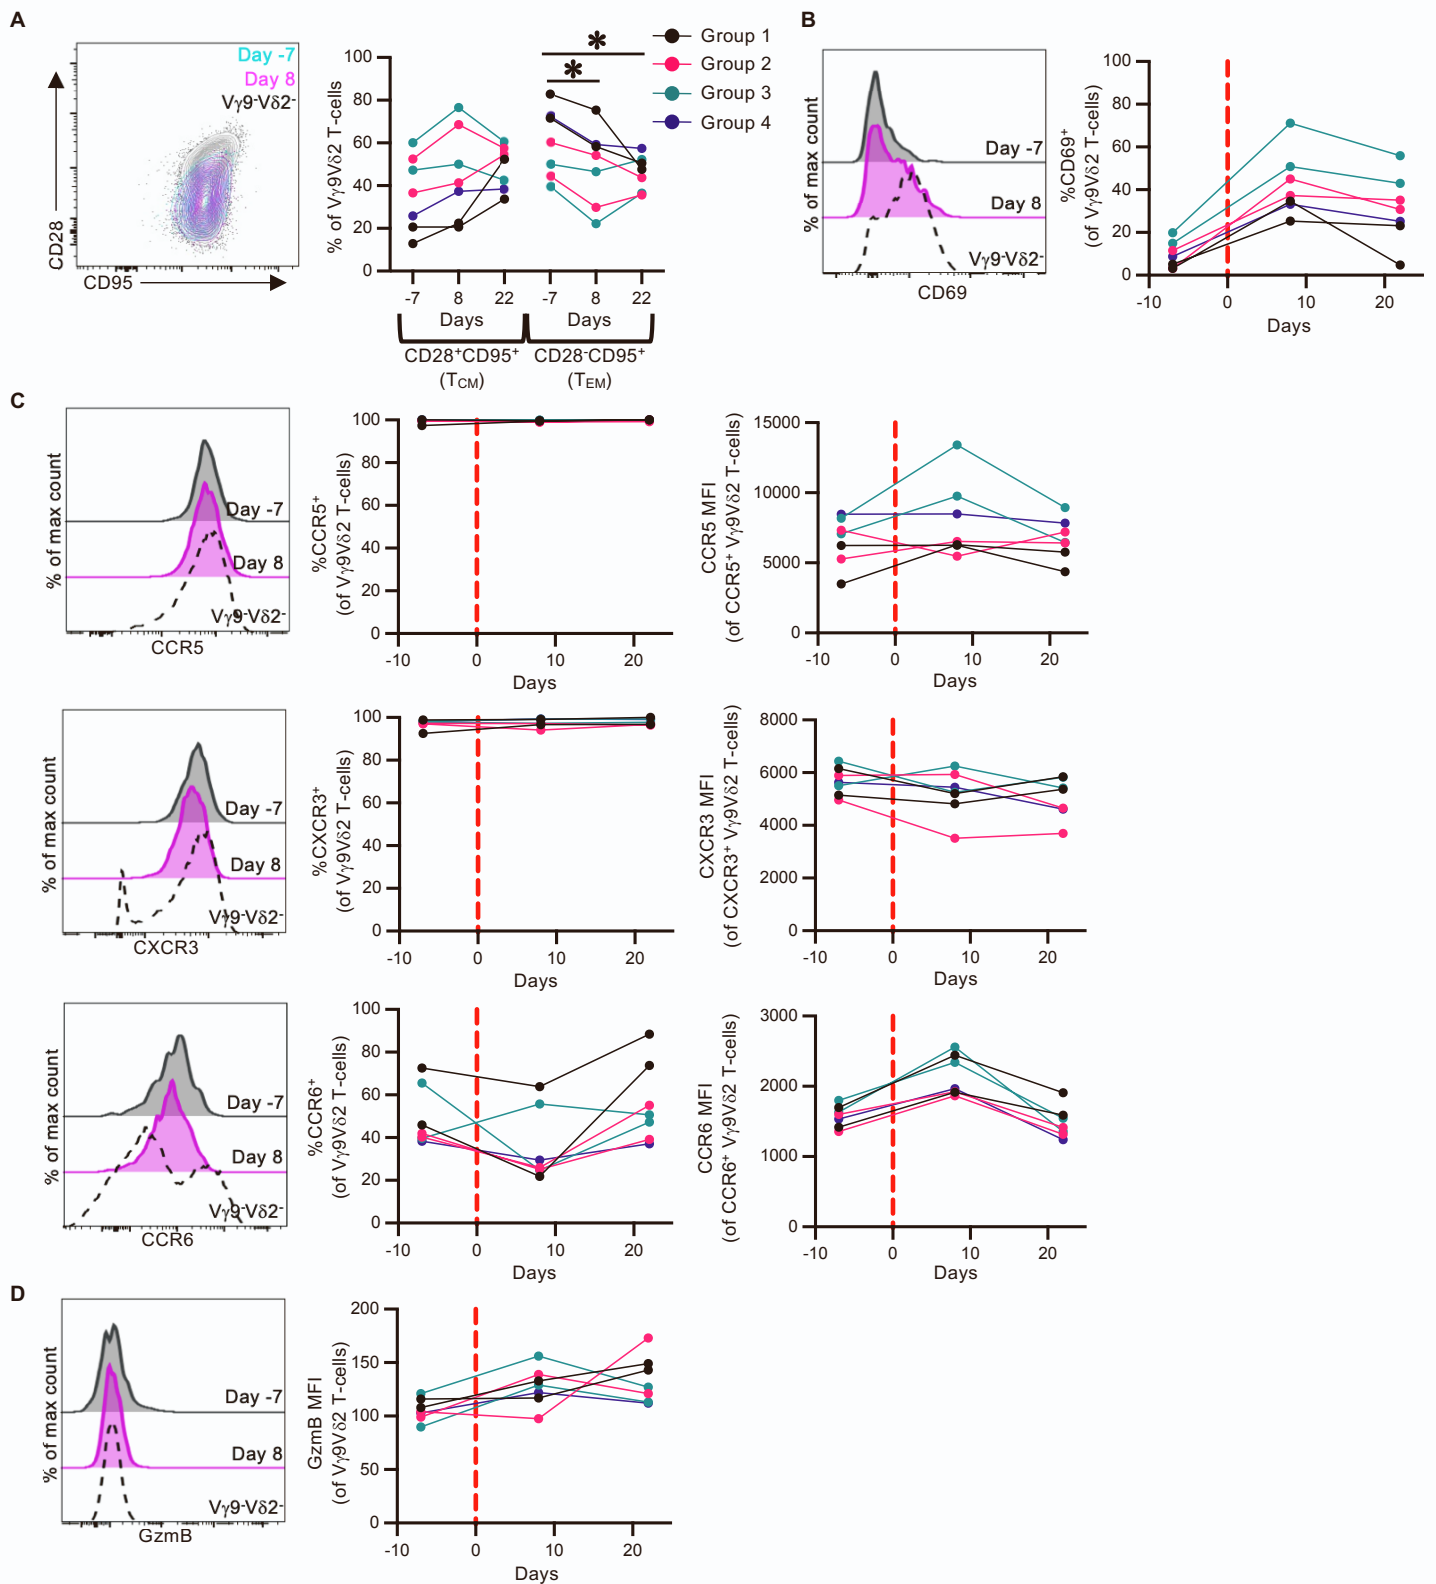

**Figure S2: Phenotype of *in vivo* expanded V $\gamma$ 9V $\delta$ 2 T-cells in bronchoalveolar lavage fluid (BAL), related to figure 4.** Phenotyping was performed on freshly isolated BAL samples (n= 7 animals; 1-2 per treatment group). **(A)** Representative FACS plot and frequencies of central memory (T<sub>CM</sub>; CD28<sup>+</sup>CD95<sup>+</sup>) and effector memory (T<sub>EM</sub>; CD28<sup>-</sup>CD95<sup>+</sup>) V $\gamma$ 9V $\delta$ 2 T-cells pre- and post-antigen administration. Expanded V $\gamma$ 9V $\delta$ 2 T-cells (Day 8) are plotted in magenta, while pre-expanded V $\gamma$ 9V $\delta$ 2 T-cells (Day -7) are plotted in cyan. V $\gamma$ 9-V $\delta$ 2<sup>-</sup> T-cells are plotted in black. **(B)** Representative histograms and frequencies of CD69 expression on V $\gamma$ 9V $\delta$ 2 T-cells pre- and post-antigen administration. **(C)** Representative histograms and frequencies of chemokine receptors CCR5, CCR6, and CXCR3 on V $\gamma$ 9V $\delta$ 2 T-cells pre- and post-antigen administration. **(D)** Representative histograms and median fluorescence intensities (MFI) of granzyme B (GzmB) expression in V $\gamma$ 9V $\delta$ 2 T-cells pre- and post-antigen administration. Each point on the graphs represents an individual animal from each timepoint. Data collected from 1 experiment. Statistics assessed by Friedman test with Dunn's multiple comparisons correction across all 4 groups **(A)**. \*p < 0.05

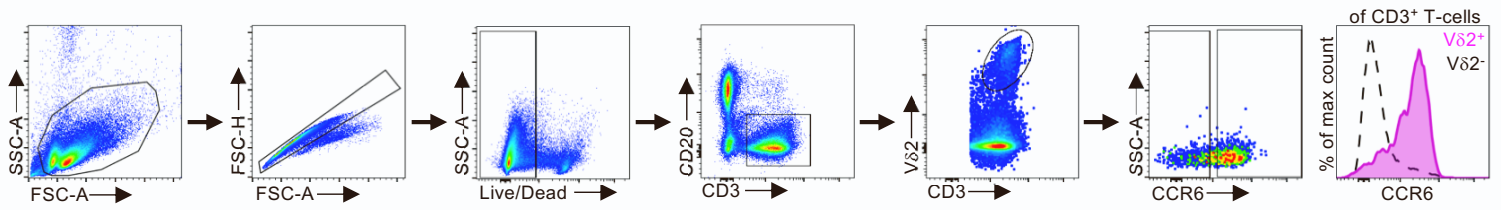

**Figure S3: Gating strategy for CCR6 Sorted Vδ2<sup>+</sup> T-cells, related to Figure 5.** CCR6<sup>+</sup> and CCR6<sup>-</sup> CD3<sup>+</sup>Vδ2<sup>+</sup> were identified for sort purification using the indicated gating strategy. The histogram illustrates the CCR6 expression on Vδ2<sup>+</sup> (magenta) and Vδ2<sup>-</sup> (black) T-cells, which was used to determine the CCR6 sort gate placement.

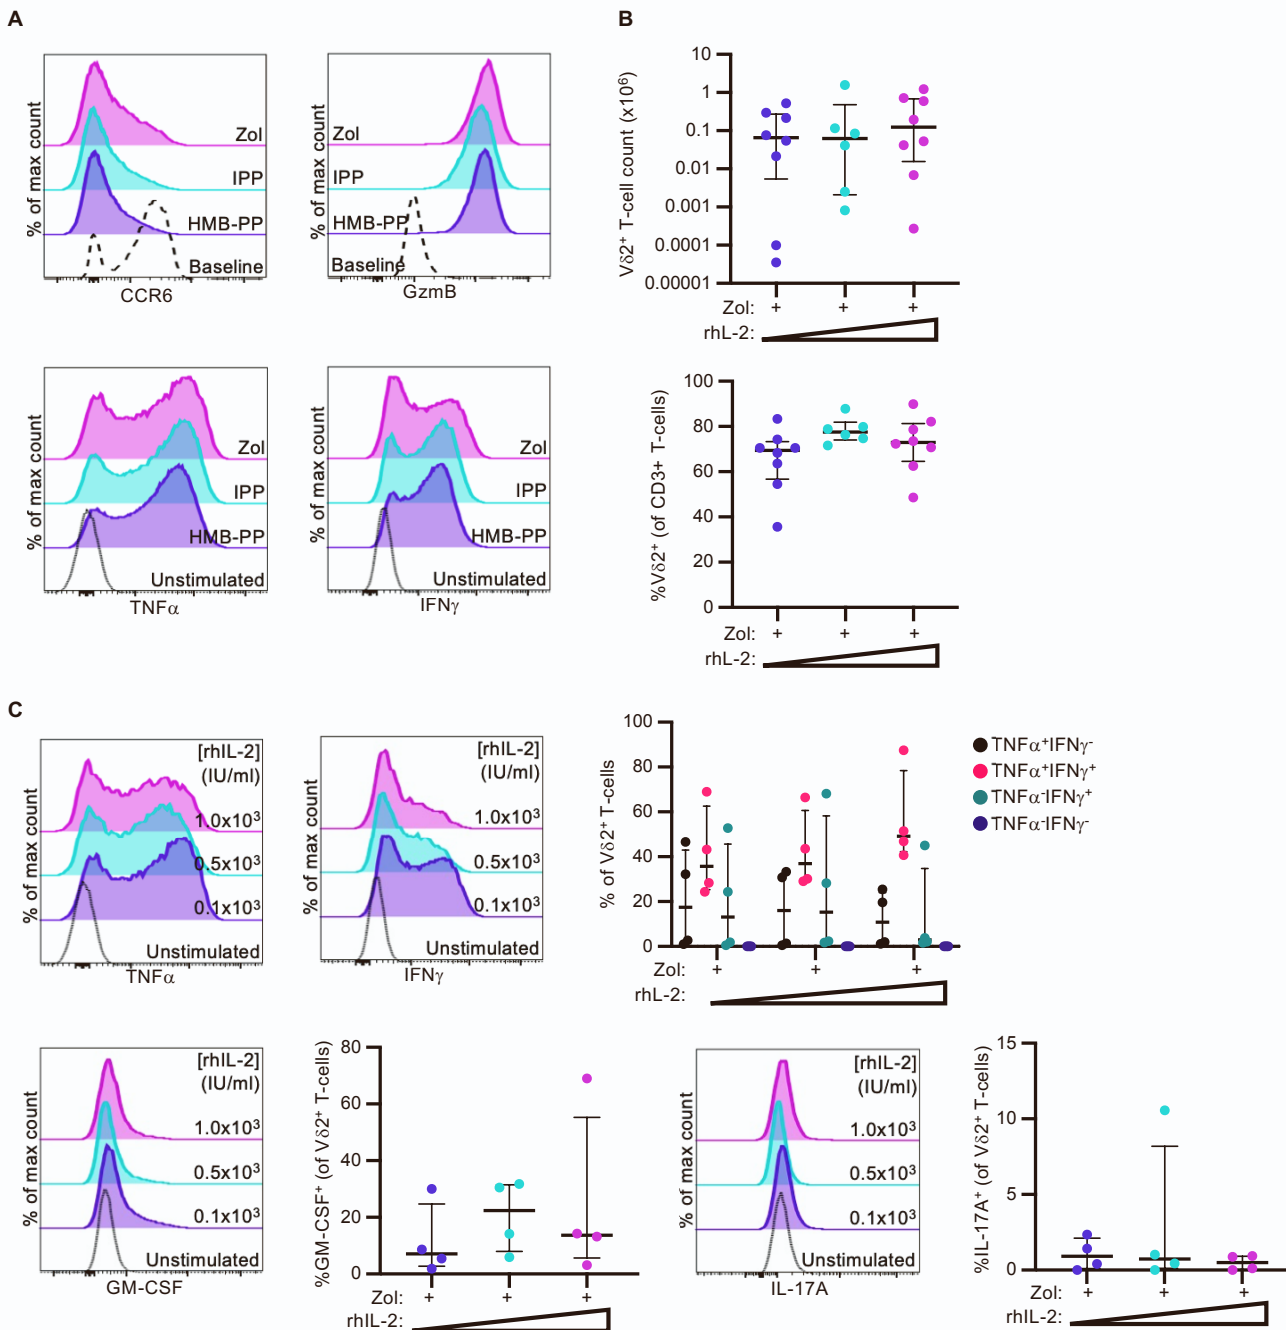

**Figure S4: Phenotypic changes in pigtail macaque V $\delta$ 2<sup>+</sup> T-cells following *in vitro* expansion, related to Figure 6. (A) Representative histograms of CCR6, Granzyme B (GzmB), TNF $\alpha$ , and IFN $\gamma$  expression on *in vitro* expanded V $\delta$ 2<sup>+</sup> T-cells (n = 3 animals from 2 independent experiments). Cultures were expanded with rhIL-2 (1 x10<sup>3</sup> IU/mL) and Zol (15 $\mu$ M), IPP (4 $\mu$ g/mL), or HMB-PP (20ng/mL) for 13 days. (B) Absolute V $\delta$ 2<sup>+</sup> T-cell counts and V $\delta$ 2<sup>+</sup> T-cell frequencies as a percentage of total CD3<sup>+</sup> T-cells (n = 6-8 animals from 4 independent experiments). (C) Representative histograms and frequencies of IFN $\gamma$  (%), TNF $\alpha$  (%), GM-CSF (%), and IL-17A (%) expression on *in vitro* expanded V $\delta$ 2<sup>+</sup> T-cells (n = 4 animals from 2 independent experiments). All expansions were performed with cryopreserved pigtail macaque peripheral blood mononuclear cells over a 13-day expansion period. All intracellular cytokine stimulation assays were performed on mitogenically stimulated V $\delta$ 2<sup>+</sup> T-cells, as described in the Method details. Cytokine production frequencies were calculated following background subtraction using paired unstimulated control samples. Each point on the graphs represents an individual animal for each expansion condition. Lines and error bars indicate the median and interquartile range. Statistics assessed by Kruskal-Wallis test with Dunn's multiple comparisons correction (B) or Friedman test with Dunn's multiple comparisons correction (C).**

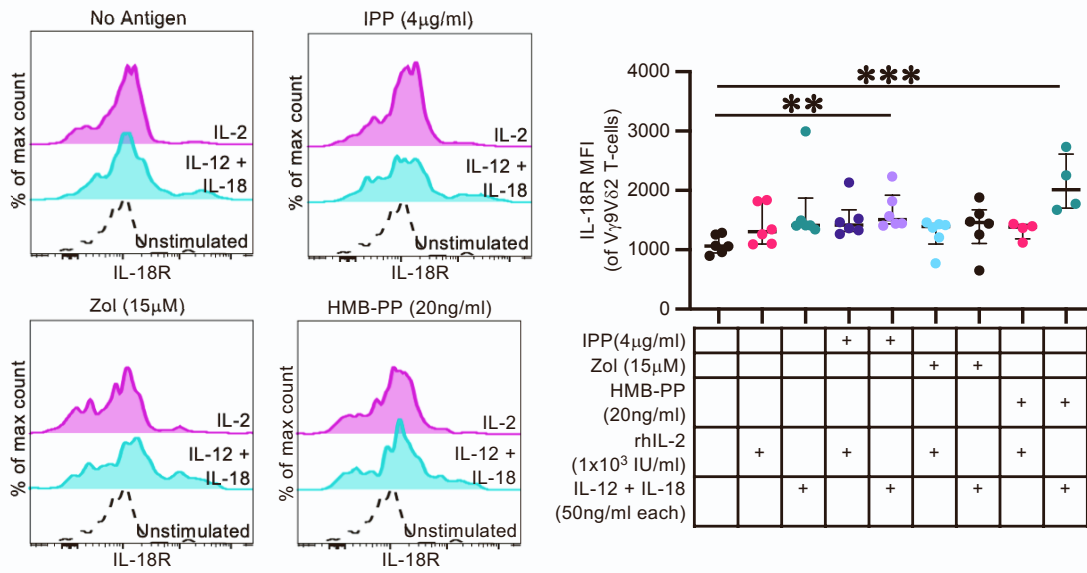

**Figure S5: Phenotypic changes in pigtail macaque  $V\gamma 9V\delta 2$  T-cells following acute *in vitro* stimulation, related to Figure 6.** Representative frequencies of IL-18R (MFI) expression on *in vitro* stimulated  $V\gamma 9V\delta 2$  T-cells ( $n = 4-7$  per group from 3 independent experiments) that were incubated for 72hrs with the indicated stimuli prior to evaluation. Each point on the graph represents an individual animal for each stimulation condition. Lines and error bars indicate the median and interquartile range. Statistics assessed by the Kruskal-Wallis test with Dunn's multiple comparisons correction. \*\* $p < 0.01$ , \*\*\* $p < 0.001$

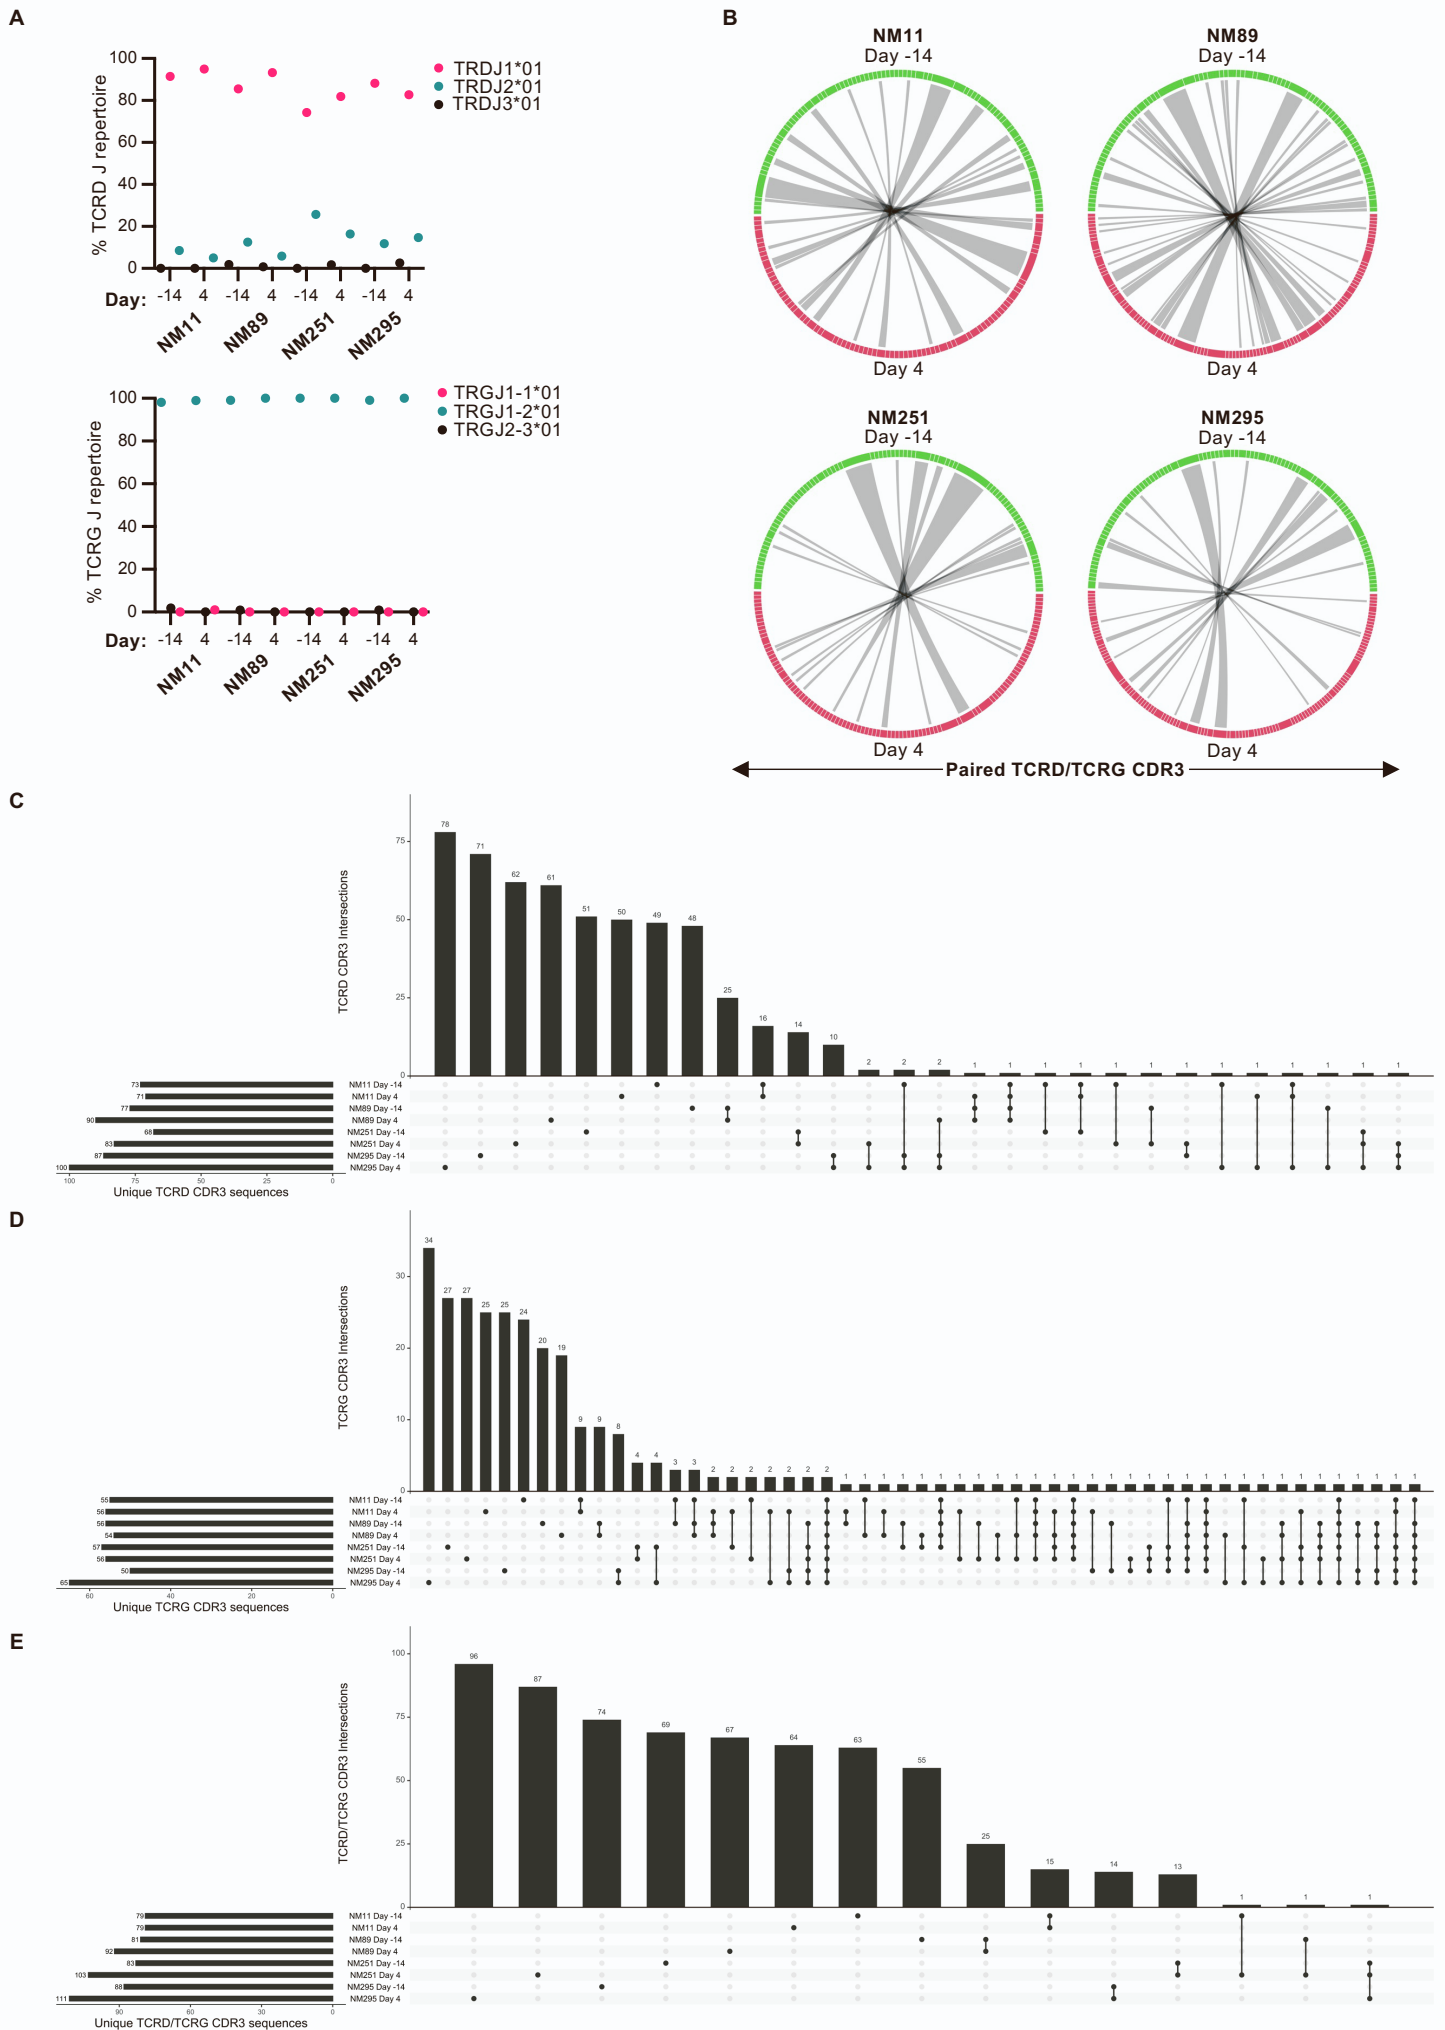

**Figure S1: Peripheral blood V $\gamma$ 9V $\delta$ 2 clonality and clonal sharing between individuals, related to Figure 7**

(figure legend on next page)



**Figure S6: Peripheral blood V $\gamma$ 9V $\delta$ 2 clonality and clonal sharing between individuals, related to Figure 7:** (A) TCRD and TCRG J-chain usage within pigtail macaque V $\gamma$ 9V $\delta$ 2 T-cells pre-expansion (Day -14) and during peak *in vivo* expansion (Day 4). J-chain usage is presented as a percentage of the total chain recovery for each animal at each timepoint, and TRDJ/TRGJ chains are labelled according to IMGT allele names (species: *Macaca mulatta*). (B) Normalized, paired TCRD/TCRG clonotype sharing between pre-expanded (day -14) and expanded (day 4) samples in individual animals. (C-E) UpSet plots illustrating individual TCRD (C), TCRG (D), and paired TCRD/TCRG (E) clonotype sharing within individual animals and between animals.

**Table S1: V $\gamma$ 9V $\delta$ 2 T-cell diversity following *in vivo* pharmacological expansion, related to Figure 7.**

|           | Number of reads |                 | Richness        |    |     |         |                              | Simpson's diversity index  |       |       |          |                              |
|-----------|-----------------|-----------------|-----------------|----|-----|---------|------------------------------|----------------------------|-------|-------|----------|------------------------------|
|           | Animal ID       | T1 <sup>a</sup> | T2 <sup>b</sup> | T1 | T2  | T2 - T1 | <i>p</i> -value <sup>c</sup> | Shared clones <sup>d</sup> | T1    | T2    | T2 - T1  | <i>p</i> -value <sup>c</sup> |
| TCRD      | NM11            | 106             | 99              | 73 | 71  | 2       | 0.7400                       | 19                         | 0.979 | 0.979 | 2.94E-04 | 0.9460                       |
|           | NM89            | 104             | 135             | 77 | 90  | 13      | 0.6959                       | 27                         | 0.979 | 0.982 | 0.003    | 0.5169                       |
|           | NM251           | 109             | 116             | 68 | 83  | 15      | 0.0531                       | 15                         | 0.962 | 0.973 | 0.011    | 0.1582                       |
|           | NM295           | 110             | 147             | 87 | 100 | 13      | 0.9279                       | 15                         | 0.983 | 0.982 | 0.001    | 0.7870                       |
| TCRG      | NM11            |                 |                 | 55 | 56  | 1       | 0.8297                       | 17                         | 0.958 | 0.958 | 5.13E-04 | 0.9577                       |
|           | NM89            |                 |                 | 56 | 54  | 2       | 0.8811                       | 27                         | 0.970 | 0.961 | 0.09     | 0.2459                       |
|           | NM251           |                 |                 | 57 | 56  | 1       | 0.8325                       | 19                         | 0.957 | 0.940 | 0.017    | 0.0979                       |
|           | NM295           |                 |                 | 50 | 65  | 15      | 0.3092                       | 18                         | 0.920 | 0.953 | 0.033    | 0.0535                       |
| TCRD/TCRG | NM11            |                 |                 | 79 | 79  | 0       | 0.9504                       | 15                         | 0.981 | 0.982 | 0.001    | 0.7964                       |
|           | NM89            |                 |                 | 81 | 92  | 11      | 0.8419                       | 25                         | 0.982 | 0.983 | 0.001    | 0.7717                       |
|           | NM251           |                 |                 | 83 | 103 | 20      | 0.0042                       | 14                         | 0.976 | 0.988 | 0.012    | 0.0022                       |
|           | NM295           |                 |                 | 88 | 111 | 23      | 0.6203                       | 14                         | 0.984 | 0.985 | 0.001    | 0.6832                       |

<sup>a</sup> T1: Day -14

<sup>b</sup> T2: Day 4

<sup>c</sup> *p*-values were calculated using the randomization test, where the *p*-value for the difference in diversity is the probability that a randomly distributed pool of CDR3 sequences between the 2 timepoints would have a difference in richness/Simpson's diversity index greater than the actual difference (n = 10,000 random CDR3 distributions).

<sup>d</sup> Number of shared unique clones between T1 and T2

**Table S2: R package usage for TCR sequencing analysis, related to STAR Methods Section.**

| Analysis                          | R package (version)        | Publication                                                                                                                                                                                                        |
|-----------------------------------|----------------------------|--------------------------------------------------------------------------------------------------------------------------------------------------------------------------------------------------------------------|
| Alluvial plots                    | ggalluvial (v0.12.3)       | Brunson, 2020 [S1]                                                                                                                                                                                                 |
| Sequence logo                     | msa (v1.26.0) <sup>a</sup> | Bodenhofer et al., 2015 [S2]                                                                                                                                                                                       |
| Simpson Diversity Index, Richness | vegan (v2.6-2)             | Jari Oksanen, et al. (2022). vegan: Community Ecology Package. <a href="https://CRAN.R-project.org/package=vegan">https://CRAN.R-project.org/package=vegan</a> [S3]                                                |
| Randomization test                | parallel                   | R Core Team (2022). R: A language and environment for statistical computing. R Foundation for Statistical Computing, Vienna, Austria. URL <a href="https://www.R-project.org/">https://www.R-project.org/</a> [S4] |
| Circos plots                      | circlize (v0.4.15)         | Gu et al., 2014 [S5]                                                                                                                                                                                               |
| UpSet plots                       | UpSetR (v1.4.0)            | Conway et al., 2017 [S6]                                                                                                                                                                                           |
| Miscellaneous                     | Tidyyverse (v1.3.1)        | Wickham et al., 2019 [S7]                                                                                                                                                                                          |

<sup>a</sup> Sequence alignments performed with the "ClustalW" alignment algorithm

### Supplemental references:

[S1] Brunson, J. (2020). ggalluvial: Layered Grammar for Alluvial Plots. *J Open Source Softw* 5, 2017. 10.21105/joss.02017.

[S2] Bodenhofer, U., Bonatesta, E., Horejš-Kainrath, C., and Hochreiter, S. (2015). msa: an R package for multiple sequence alignment. *Bioinformatics* 31, 3997–3999. 10.1093/bioinformatics/btv494.

[S3] Oksanen, J., Simpson, G.L., Blanchet, F.G., Kindt, R., Legendre, P., Minchin P.R., O'Hara, R.B., Solymos, P., Stevens, M.H., Szoecs, E., Wagner, H., Barbour, M., Bedward, M., Bolker, B., Borcard, D., Carvalho, G., Chirico, M., De Caceres, M., Durand, S., Antoniazzi Evangelista, H.B., FitzJohn, R., Friendly, M., Furneaux, B., Hannigan, G., Hill, M.O., Lahti, L., McGlinn, D., Ouellette, M-H., Cunha, E.R., Smith, T., Stier, A., Ter Braak, C.J.F., and Weedon, J. (2022). vegan: Community Ecology Package. <https://CRAN.R-project.org/package=vegan>

[S4] R Core Team (2022). R: A language and environment for statistical computing. R Foundation for Statistical Computing, Vienna, Austria. URL <https://www.R-project.org/>

[S5] Gu, Z., Gu, L., Eils, R., Schlesner, M., and Brors, B. (2014). circlize implements and enhances circular visualization in R. *Bioinformatics* 30, 2811–2812. 10.1093/bioinformatics/btu393.

[S6] Conway, J.R., Lex, A., and Gehlenborg, N. (2017). UpSetR: an R package for the visualization of intersecting sets and their properties. *Bioinformatics* 33, 2938–2940. 10.1093/bioinformatics/btx364.

[S7] Wickham, H., Averick, M., Bryan, J., Chang, W., McGowan, L., François, R., Golemund, G., Hayes, A., Henry, L., Hester, J., et al. (2019). Welcome to the Tidyverse. *J Open Source Softw* 4, 1686. 10.21105/joss.01686.
